# Supplementary material for: Peer review and preprint policies are unclear at most major journals
Source: PubMed Central journal article supplement (PMC7577440; doi:10.1371/journal.pone.0239518), 2020-10-21
Supplement: pone.0239518.s002.pdf [file pone.0239518.s002.pdf]

**S1 Table. Numerical output from Multiple Correspondence analysis.**

| <b>Variable</b>                             | <b>mass</b> | <b>inertia</b> | <b>k=1</b> | <b>correlation<br/>with dim 1</b> | <b>contribution<br/>to dim 1</b> | <b>k=2</b> | <b>correlation<br/>with dim 2</b> | <b>contribution<br/>to dim 2</b> |
|---------------------------------------------|-------------|----------------|------------|-----------------------------------|----------------------------------|------------|-----------------------------------|----------------------------------|
| Coreview ??                                 | 151         | 48             | 75         | 586                               | 33                               | 29         | 87                                | 86                               |
| Coreview ++                                 | 49          | 148            | -233       | 586                               | 103                              | -90        | 87                                | 267                              |
| Posting preprints ??                        | 72          | 118            | 81         | 305                               | 18                               | -81        | 302                               | 320                              |
| Posting preprints ++                        | 128         | 66             | -45        | 305                               | 10                               | 45         | 302                               | 178                              |
| Citing preprints ??                         | 147         | 52             | 95         | 861                               | 52                               | -19        | 35                                | 37                               |
| Citing preprints ++                         | 53          | 144            | -264       | 861                               | 143                              | 53         | 35                                | 102                              |
| Revealing reviewer identities to authors ?? | 115         | 95             | 195        | 728                               | 171                              | 7          | 1                                 | 4                                |
| Revealing reviewer identities to authors ++ | 85          | 129            | -264       | 728                               | 231                              | -10        | 1                                 | 6                                |
| Peer review ??                              | 62          | 138            | 260        | 853                               | 164                              | 0          | 0                                 | 0                                |
| Peer review ++                              | 138         | 62             | -117       | 853                               | 74                               | 0          | 0                                 | 0                                |
| Business, Economics & Management            |             |                | 376        | 936                               |                                  | -98        | 64                                |                                  |
| Chemical & Materials Sciences               |             |                | -109       | 108                               |                                  | 313        | 892                               |                                  |
| Engineering & Computer Science              |             |                | 59         | 70                                |                                  | 216        | 930                               |                                  |
| Health & Medical Sciences                   |             |                | -29        | 67                                |                                  | -107       | 933                               |                                  |
| Humanities, Literature & Arts               |             |                | 169        | 749                               |                                  | -98        | 251                               |                                  |
| Life Sciences & Earth Sciences              |             |                | -388       | 965                               |                                  | 74         | 35                                |                                  |

|                            |      |      |      |     |
|----------------------------|------|------|------|-----|
| Physics & Mathematics      | -121 | 757  | -68  | 243 |
| Social Sciences            | 105  | 310  | -157 | 690 |
| American Chemical Society  | -36  | 24   | 233  | 976 |
| Elsevier                   | 124  | 1000 | 0    | 0   |
| IEEE                       | 206  | 727  | 126  | 273 |
| Royal Society of Chemistry | -158 | 317  | 231  | 683 |
| SAGE                       | -177 | 708  | -114 | 292 |
| Springer Nature            | -532 | 915  | 163  | 85  |
| Wiley                      | 491  | 913  | 151  | 87  |
| Other publishers           | 49   | 77   | -170 | 923 |
